# Supplementary material for: Neural Development Features: Spatio-Temporal Development of the Caenorhabditis elegans Neuronal Network
Source: PubMed Central journal article supplement (PMC3017107; doi:10.1371/journal.pcbi.1001044), 2011-01-06
Supplement: pcbi.1001044.s005.pdf [file pcbi.1001044.s005.pdf]

**Table S1.** Number of short, medium and long-length connections for each type of synapse (electrical synapse, chemical synapse, or a combination of both features).

|                  | Short | Medium | Long | Total |
|------------------|-------|--------|------|-------|
| Gap-junction     | 546   | 66     | 40   | 652   |
| Chemical synapse | 1495  | 180    | 287  | 1962  |
| Combination      | 260   | 52     | 64   | 376   |
| Total            | 2301  | 298    | 391  | 2990  |
